# Supplementary material for: Certainty in Uncertain Times: Dental Education during the COVID-19 Pandemic–A Qualitative Study
Source: MDPI journal article supplement (doi:10.3390/ijerph20043090), 2023-02-10
Supplement: s1 [file s1]

|                                           |
|-------------------------------------------|
| Interview guide for lectures and students |
|-------------------------------------------|

- 1) How did you perceive teaching and learning as part of the switch to digital courses?
- 2) How did you perceive the implementation of the practical courses?
- 3) In your previous statements, in which moments did you feel safe?
- 4) In which moments did you feel more insecure?
- 5) What would be the background, a possible explanation that you describe it that way?
- 6) What conditions would you like to have that would make you feel more comfortable/safe in such a situation?
- 7) Is there anything you could spontaneously name right now that would help you feel more confident?
